# Supplementary material for: Alteration of RNA modification signature in human sperm correlates with sperm motility
Source: PubMed Central journal article supplement — Mol Hum Reprod. 2022 Aug 12;28(9):gaac031. doi: 10.1093/molehr/gaac031 (PMC9422301; doi:10.1093/molehr/gaac031), 2022-08-12
Supplement: gaac031_supplementary_data.pdf [file gaac031_supplementary_data.pdf]

## Title

**Alteration of RNA modification signature in human sperm correlated with sperm motility**

## Authors

Huanping Guo<sup>1#</sup>, Xipeng Shen<sup>1#</sup>, Hua Hu<sup>3#</sup>, Peng Zhou<sup>3</sup>, Tong He<sup>1,4</sup>, Lin Xia<sup>1</sup>, Dongmei Tan<sup>4</sup>, Xi Zhang<sup>1\*</sup> and Yunfang Zhang<sup>1,2\*</sup>

## Supplementary Figures:

**Supplementary Figure S1:** Abbreviations, names, transitions, and structural formula of different RNA modification marks that detected on sperm RNA samples.

**Supplementary Figure S2:** The levels of different RNA modification marks on the total RNAs of human sperm.

**Supplementary Figure S3:** Alteration of RNA modification abundance on human sperm RNA fragments >80 nt in AZS and TZS samples.

**Supplementary Figure S4:** Alteration of RNA modification abundance on human sperm 50-80 nt RNA fragments in AZS and TZS samples.

**Supplementary Figure S5:** Alteration of RNA modification abundance on human sperm 25-50 nt RNA fragments in AZS and TZS samples.

**Supplementary Figure S6:** Alteration of RNA modification abundance on human sperm 17-25 nt RNA fragments in AZS and TZS samples.

**Supplementary Figure S7:** Linear regression analyses between different RNA modification marks in all detected sperm RNA samples.

**Supplementary Figure S8:** Correlation analyses between human age and sperm motility scores for all participants.

**Supplementary Figure S9:** Original figures of microscope picture and full uncropped gels.

## Supplementary Tables:

**Supplementary Table SI:** Primer sequences for RT-PCR.

**Supplementary Table SII:** The concentration of RNA modification standards.

**Supplementary Table SIII:** Clinical parameter analyses of ejaculated human semen samples.

**Supplementary Table SIV:** The  $R^2$  values of Pearson correlation analyses in Figure 4A-B.

| Abbreviation           | Name                   | Transitions | Structural Formula                                                                  | Abbreviation                      | Name                        | Transitions | Structural Formula                                                                    |
|------------------------|------------------------|-------------|-------------------------------------------------------------------------------------|-----------------------------------|-----------------------------|-------------|---------------------------------------------------------------------------------------|
| <b>A</b>               | Adenosine              | 268 > 136   |    | <b>C</b>                          | Cytidine                    | 244 > 112   |    |
| <b>Am</b>              | 2'-O-Methyladenosine   | 282 > 136   |    | <b>Cm</b>                         | 2'-O-Methylcytidine         | 258 > 112   |    |
| <b>m<sup>1</sup>A</b>  | N1-Methyladenosine     | 282 > 150   |    | <b>m<sup>3</sup>C</b>             | N3-Methylcytidine           | 258 > 126   |    |
| <b>m<sup>6</sup>A</b>  | N6-Methyladenosine     | 282 > 150   |    | <b>m<sup>5</sup>C</b>             | 5-Methylcytidine            | 258 > 126   |    |
| <b>I</b>               | Inosine                | 269 > 137   |    | <b>hm<sup>5</sup>C</b>            | 5-Hydroxymethylcytidine     | 274 > 142   |    |
| <b>Im</b>              | 2'-O-Methylinosine     | 283 > 137   |    | <b>ac<sup>4</sup>C</b>            | N4-Acetylcytidine           | 286 > 154   |    |
| <b>m<sup>1</sup>I</b>  | N1-Methylinosine       | 283 > 151   |    | <b>G</b>                          | Guanosine                   | 284 > 152   |    |
| <b>U</b>               | Uridine                | 245 > 113   |   | <b>Gm</b>                         | 2'-O-Methylguanosine        | 298 > 152   |   |
| <b>Um</b>              | 2'-O-Methyluridine     | 259 > 113   |  | <b>m<sup>1</sup>G</b>             | N1-Methylguanosine          | 298 > 166   |  |
| <b>m<sup>3</sup>U</b>  | 3-Methyluridine        | 259 > 127   |  | <b>m<sup>2</sup>G</b>             | N2-Methylguanosine          | 298 > 166   |  |
| <b>m<sup>5</sup>U</b>  | 5-Methyluridine        | 259 > 127   |  | <b>m<sup>7</sup>G</b>             | N7-Methylguanosine          | 298 > 166   |  |
| <b>m<sup>5</sup>Um</b> | 5,2'-O-Dimethyluridine | 273 > 127   |  | <b>m<sup>2</sup><sub>2</sub>G</b> | N2,N2-Dimethylguanosine     | 312 > 180   |  |
| <b>Ψ</b>               | Pseudouridine          | 243 > 153   |  | <b>m<sup>2</sup><sub>7</sub>G</b> | N2,N2,N7-Trimethylguanosine | 326 > 194   |  |

**Supplementary Figure S1:** Abbreviations, names, transitions, and structural formula of different RNA modification marks that detected on sperm RNA samples.

The levels of different RNA modification marks on human sperm **total RNAs**

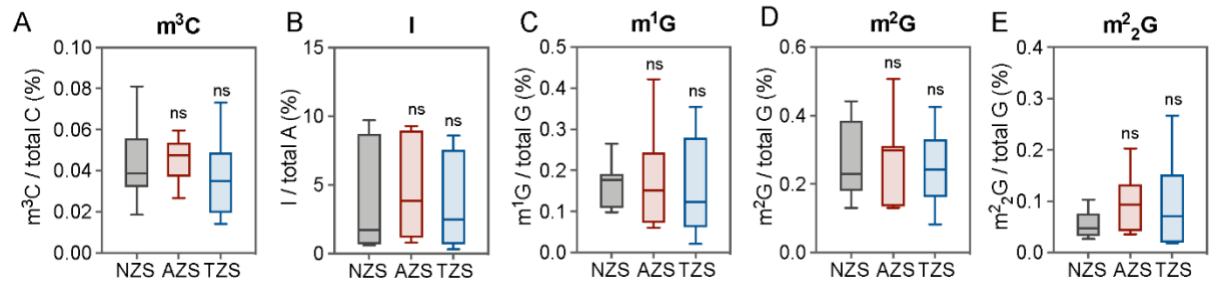

**Supplementary Figure S2:** The levels of different RNA modification marks on the total RNAs of human sperm. (A-E) comparison of RNA modification abundance on sperm total RNAs between NZS (n=6), AZS (n=6) and TZS (n=5) samples, which are shown as box plots for (A) m<sup>3</sup>C, (B) I, (C) m<sup>1</sup>G, (D) m<sup>2</sup>G and (E) m<sup>2</sup>G. NZS: Normozoospermia; AZS: Asthenozoospermia; TZS: Teratozoospermia; ns. not significant (AZS vs NZS; TZS vs AZS). Statistical analyses were performed with one-way ANOVA and uncorrected Fisher's least square difference (LSD) for multiple comparisons of RNA modification levels by GraphPad Prism 8.

A

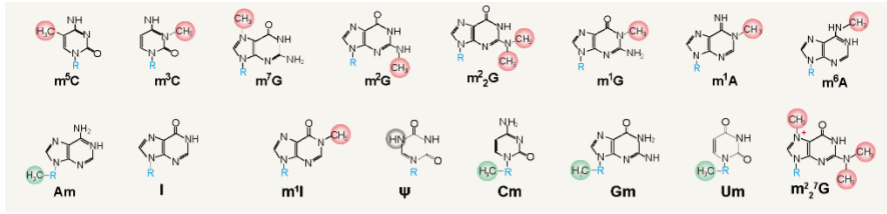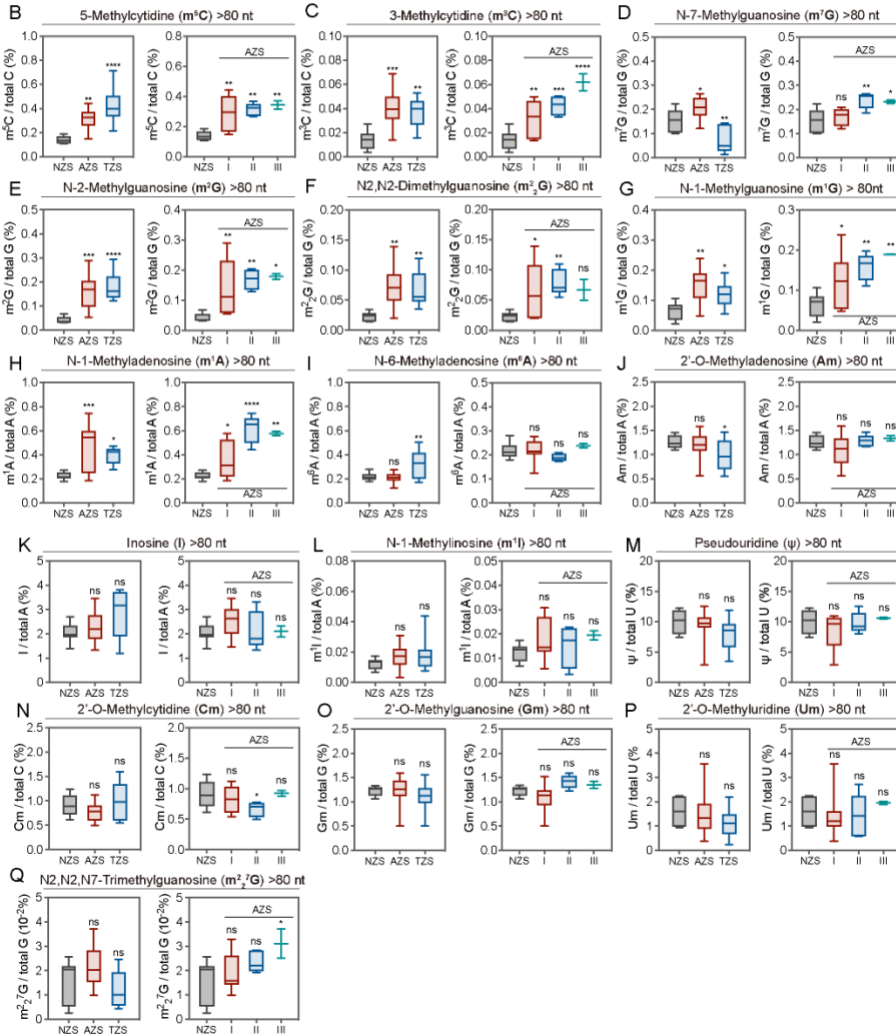

**Supplementary Figure S3:** Alteration of RNA modification abundance on human sperm RNA fragments >80 nt in AZS and TZS samples. **(A)** structural formula of different RNA modification marks. **(B-Q)** levels of different RNA modification marks on sperm RNA fragments >80 nt in NZS (n=7), AZS (n=15) and TZS (n=10) samples, and in AZS I (n=8), II (n=5), III (n=2) samples, which are shown as box plots for **(B)**  $m^5C$ , **(C)**  $m^3C$ , **(D)**  $m^7G$ , **(E)**  $m^2G$ , **(F)**  $m^2_2G$ , **(G)**  $m^1G$ , **(H)**  $m^1A$ , **(I)**  $m^6A$ , **(J)** Am, **(K)** I, **(L)**  $m^1I$ , **(M)**  $\Psi$ , **(N)** Cm, **(O)** Gm, **(P)** Um, **(Q)**  $m^2_2,7G$ . NZS: Normozoospermia; AZS: Asthenozoospermia; TZS: Teratozoospermia; \* $P < 0.05$  (AZS or AZS I, II, III vs NZS; TZS vs NZS), \*\* $P < 0.01$  (AZS or AZS I, II, III vs NZS; TZS vs NZS), \*\*\* $P < 0.001$  (AZS or AZS II vs NZS), \*\*\*\* $P < 0.0001$  (AZS II, III vs NZS; TZS vs NZS), ns. not significant (AZS or AZS I, II, III vs NZS; TZS vs NZS). Statistical analyses were performed with one-way ANOVA and uncorrected Fisher's least square difference (LSD) for multiple comparisons of RNA modification levels by GraphPad Prism 8.

Quantitative analysis of RNA modifications in human sperm 50-80 nt RNAs

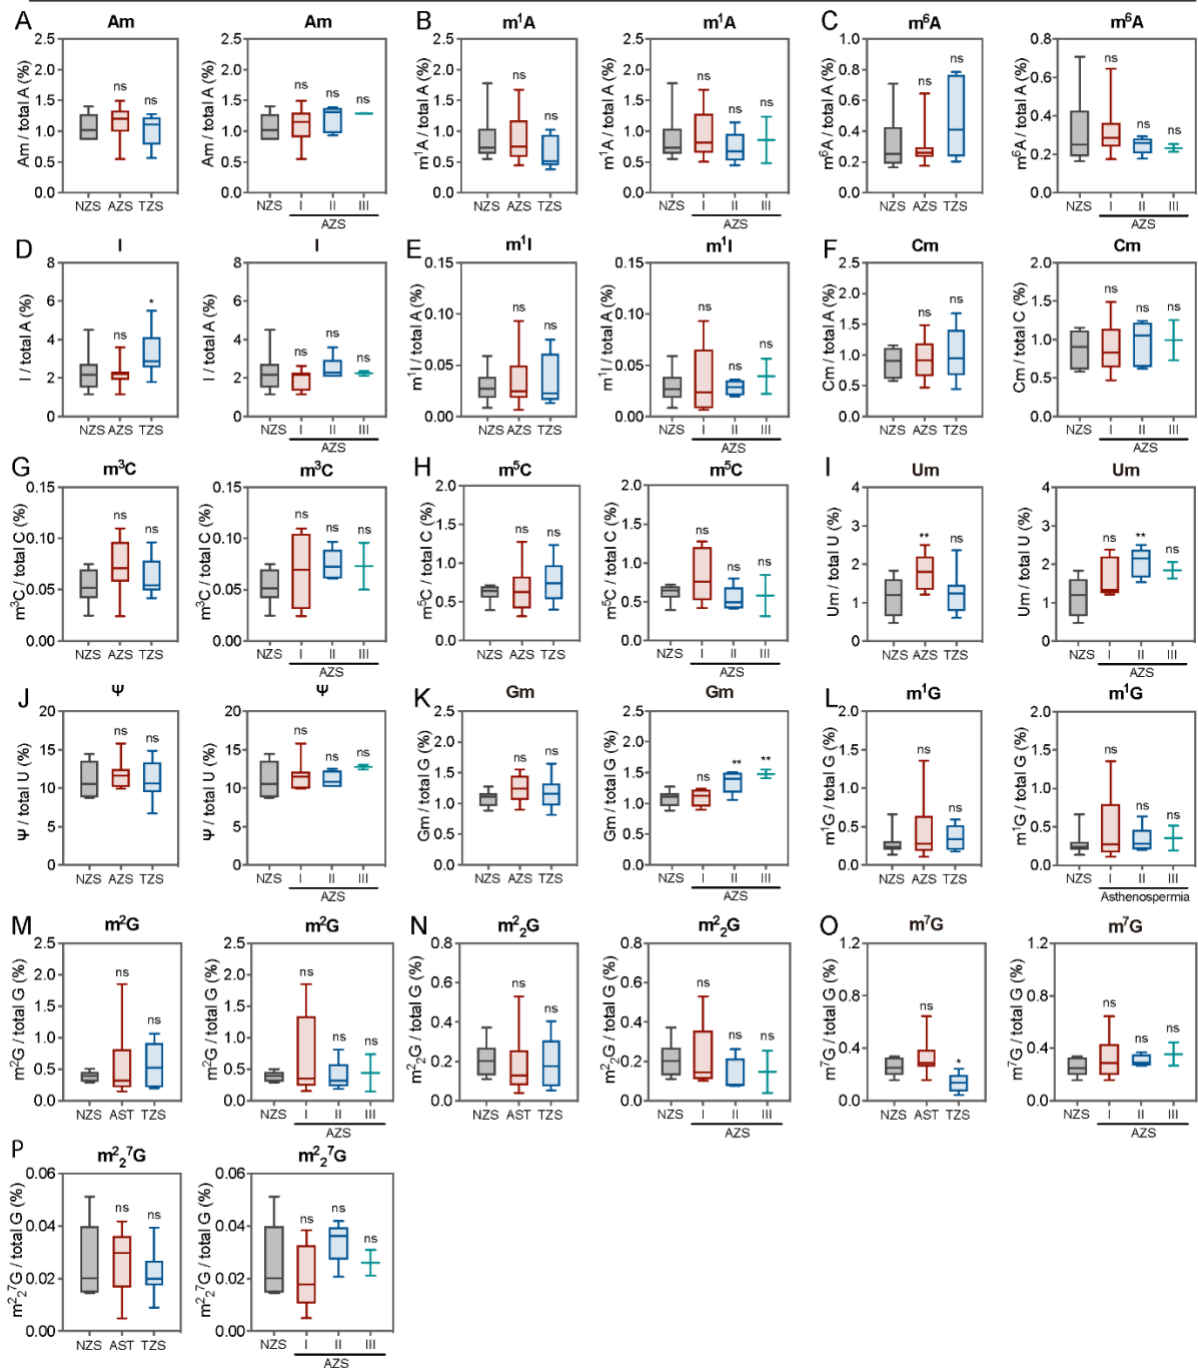

**Supplementary Figure S4:** Alteration of RNA modification abundance on human sperm 50-80 nt RNA fragments in AZS and TZS samples. The box plots show the comparisons of RNA modification abundance between NZS (n=7), AZS (n=15) and TZS (n=10) for (A) Am, (B) m<sup>1</sup>A, (C) m<sup>6</sup>A, (D) I, (E) m<sup>1</sup>I, (F) Cm, (G) m<sup>3</sup>C, (H) m<sup>5</sup>C, (I) Um, (J) Ψ, (K) Gm, (L) m<sup>1</sup>G, (M) m<sup>2</sup>G, (N) m<sub>2</sub><sup>2</sup>G, (O) m<sup>7</sup>G and (P) m<sub>2</sub><sup>2</sup>G. NZS: Normozoospermia; AZS: Asthenozoospermia; TZS: Teratozoospermia; \*P<0.05 (TZS vs NZS), \*\*P<0.01 (AZS or AZS II, III vs NZS); ns. not significant (AZS or AZS I, II, III vs NZS; TZS vs NZS). Statistical analyses were performed with one-way ANOVA and uncorrected Fisher's least square difference (LSD) for multiple comparisons of RNA modification levels by GraphPad Prism 8.

Quantitative analysis of RNA modifications in human sperm 25-50 nt RNAs

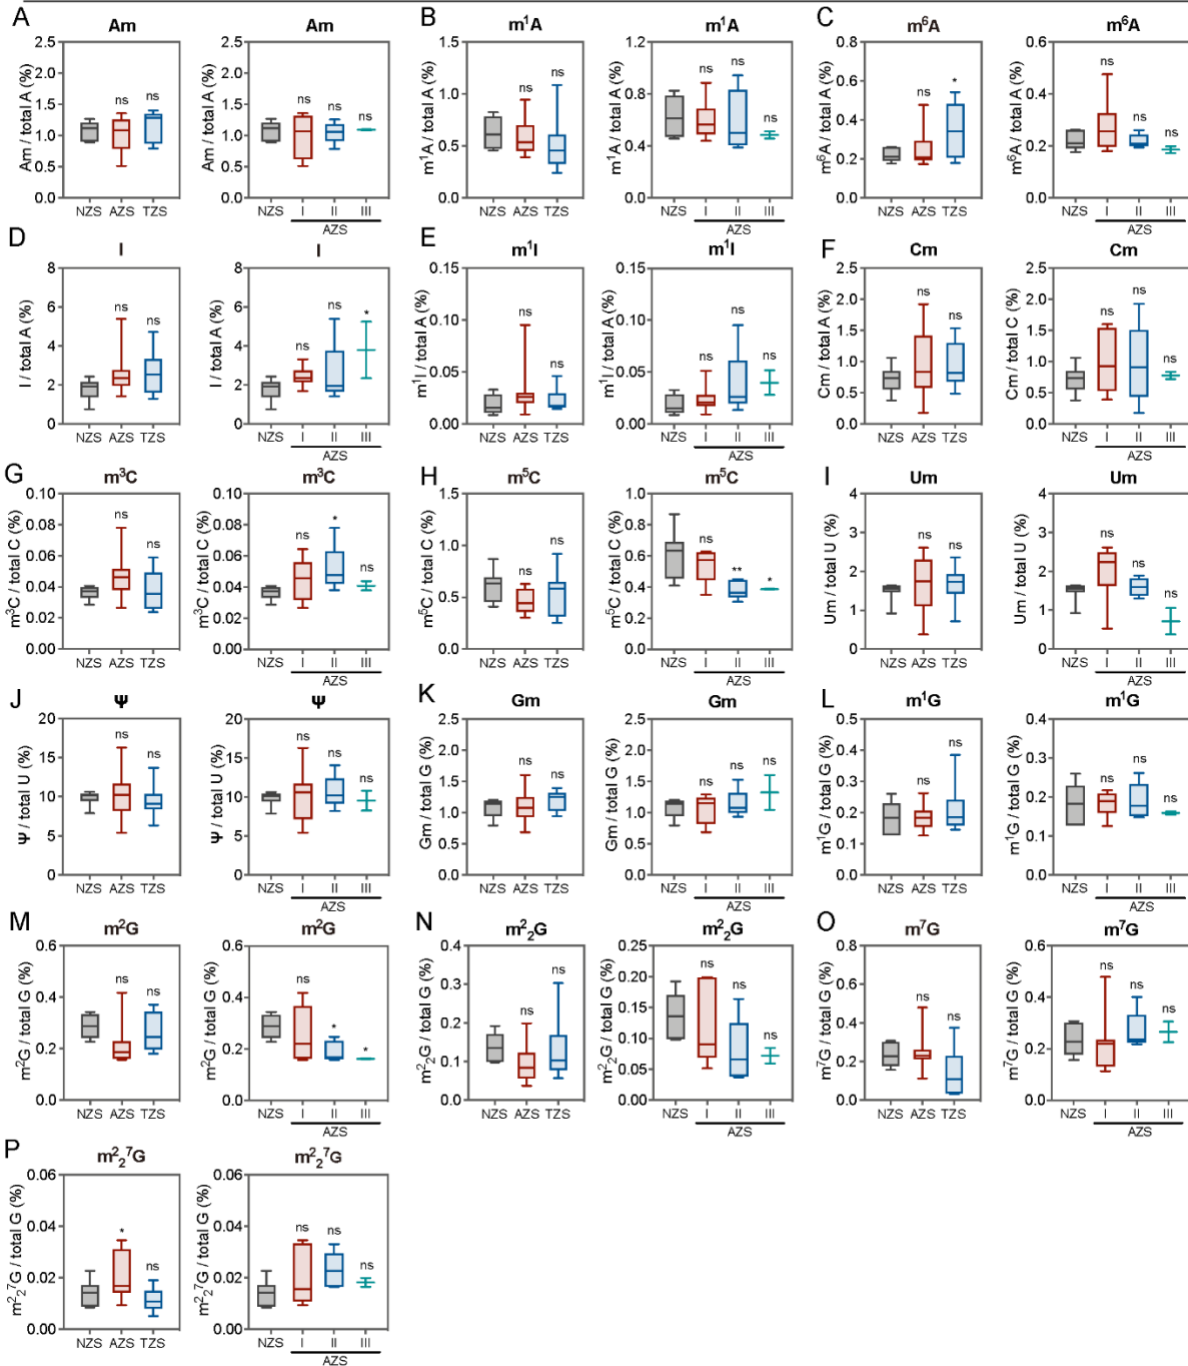

**Supplementary Figure S5:** Alteration of RNA modification abundance on human sperm 25-50 nt RNA fragments in AZS and TZS samples. The box plots show the comparisons of RNA modification abundance between NZS (n=7), AZS (n=15) and TZS (n=10) for (A) Am, (B) m<sup>1</sup>A, (C) m<sup>6</sup>A, (D) I, (E) m<sup>1</sup>I, (F) Cm, (G) m<sup>3</sup>C, (H) m<sup>5</sup>C, (I) Um, (J) Ψ, (K) Gm, (L) m<sup>1</sup>G, (M) m<sup>2</sup>G, (N) m<sup>2</sup><sub>2</sub>G, (O) m<sup>7</sup>G and (P) m<sup>2</sup><sub>7</sub>G. NZS: Normozoospermia; AZS: Asthenozoospermia; TZS: Teratozoospermia; \*P<0.05 (AZS or AZS I, II, III vs NZS; TZS vs NZS), \*\*P<0.01 (AZS II vs NZS), ns. not significant (AZS or AZS I, II, III vs NZS; TZS vs NZS). Statistical analyses were performed with one-way ANOVA and uncorrected Fisher's least square difference (LSD) for multiple comparisons of RNA modification levels by GraphPad Prism 8.

Quantitative analysis of RNA modifications in human sperm 17-25 nt RNAs

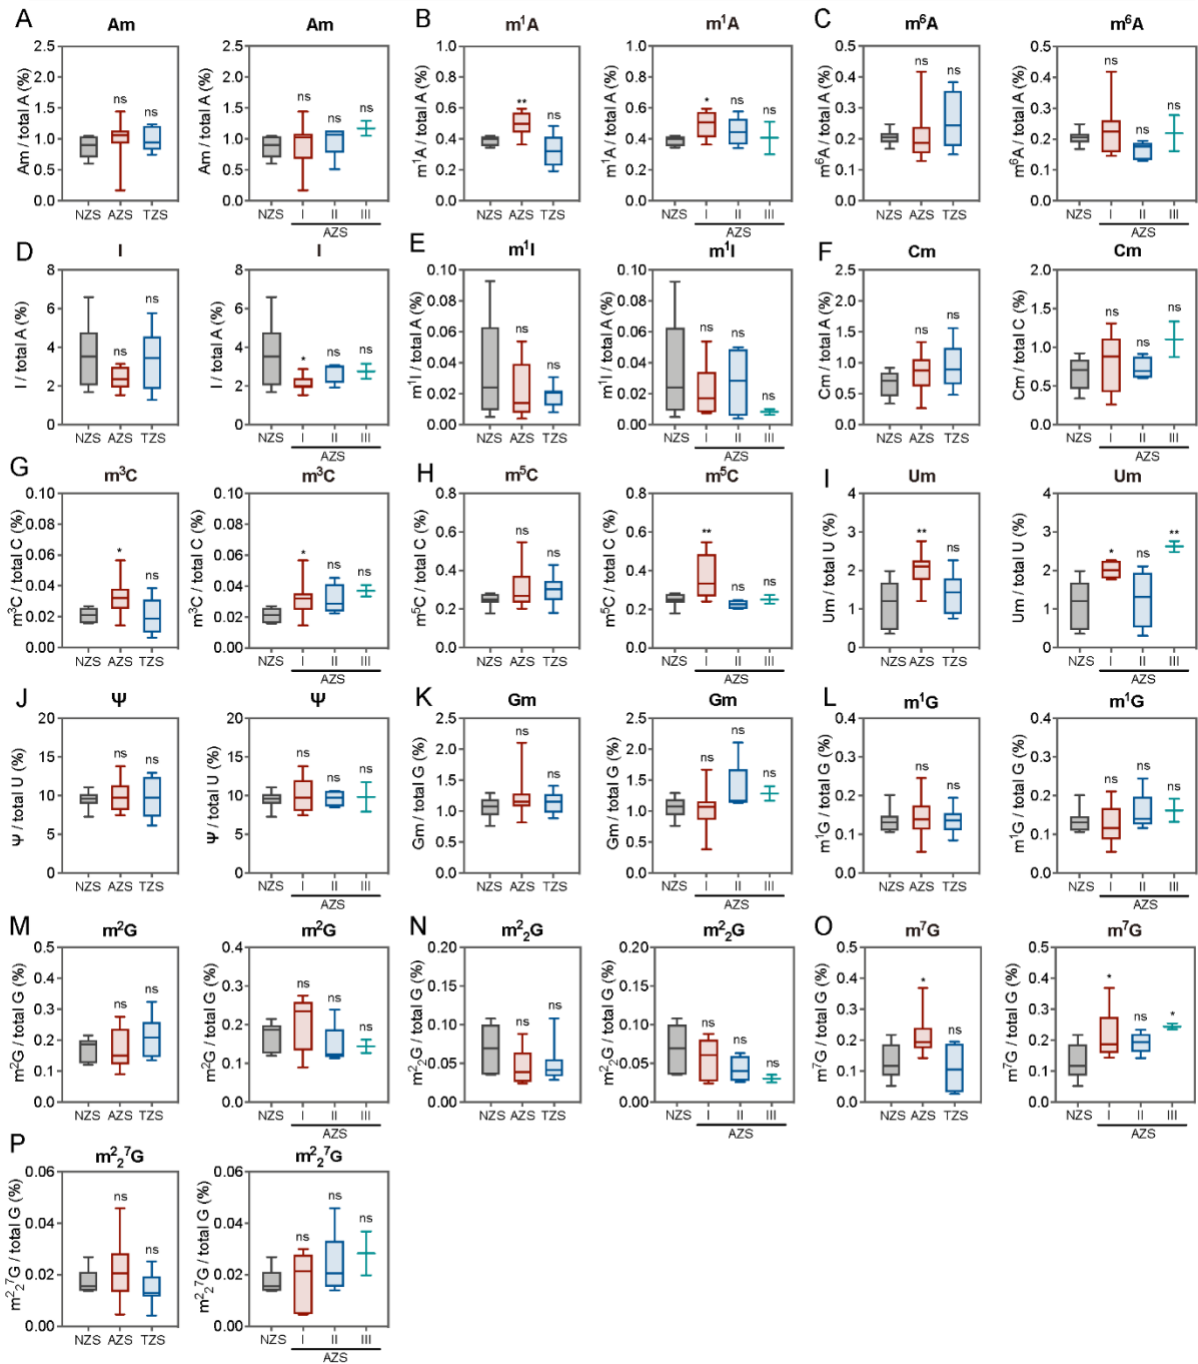

**Supplementary Figure S6:** Alteration of RNA modification abundance on human sperm 17-25 nt RNA fragments in AZS and TZS samples. The box plots show the comparisons of RNA modification abundance between NZS (n=7), AZS (n=15) and TZS (n=10) for (A) Am, (B) m<sup>1</sup>A, (C) m<sup>6</sup>A, (D) I, (E) m<sup>1</sup>I, (F) Cm, (G) m<sup>3</sup>C, (H) m<sup>5</sup>C, (I) Um, (J)  $\Psi$ , (K) Gm, (L) m<sup>1</sup>G, (M) m<sup>2</sup>G, (N) m<sub>2</sub><sup>2</sup>G, (O) m<sup>7</sup>G and (P) m<sub>2</sub><sup>7</sup>G. NZS: Normozoospermia; AZS: Asthenozoospermia; TZS: Teratozoospermia; \*P<0.05 (AZS or AZS I, III vs NZS), \*\*P<0.01(AZS or AZS I, III vs NZS), ns. not significant (AZS or AZS I, III vs NZS; TZS vs NZS). Statistical analyses were performed with one-way ANOVA and uncorrected Fisher's least square difference (LSD) for multiple comparisons of RNA modification levels by GraphPad Prism 8.



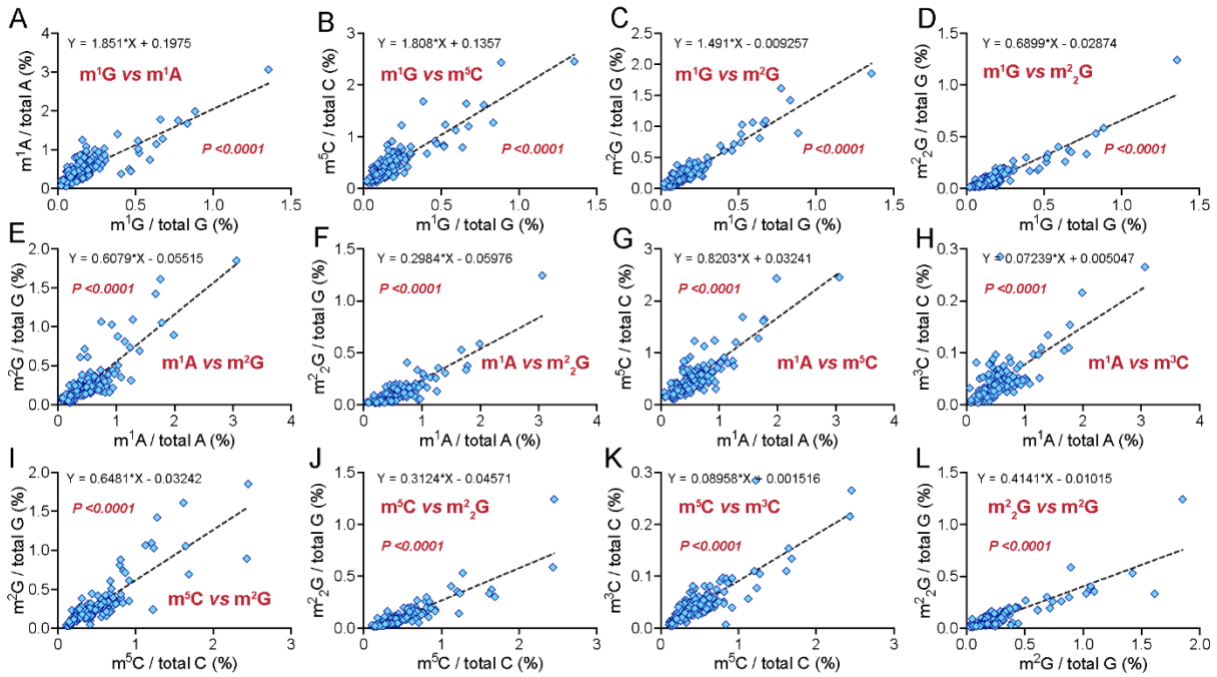

**Supplementary Figure S7: Linear regression analyses between different RNA modification marks in all detected sperm RNA samples.** (A)  $m^1G$  vs  $m^1A$ , (B)  $m^1G$  vs  $m^5C$ , (C)  $m^1G$  vs  $m^2G$ , (D)  $m^1G$  vs  $m^2G$ , (E)  $m^1A$  vs  $m^2G$ , (F)  $m^1A$  vs  $m^2G$ , (G)  $m^1A$  vs  $m^5C$ , (H)  $m^1A$  vs  $m^5C$ , (I)  $m^5C$  vs  $m^2G$ , (J)  $m^5C$  vs  $m^2G$ , (K)  $m^5C$  vs  $m^3C$  and (L)  $m^2G$  vs  $m^2G$ . The linear regression analyses were performed by GraphPad Prism 8,  $n=145$ . The equations and  $p$  values were shown on each panel.



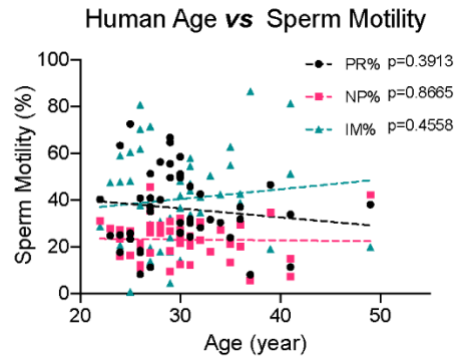

**Supplementary Figure S8: Correlation analyses between human age and sperm motility scores for all participants.** IM%: percentage of immotile sperm; PR%: percentage of progressive motility sperm; NP%: percentage of non-progressive sperm. The linear regression analysis was performed by GraphPad Prism 8, n=49.

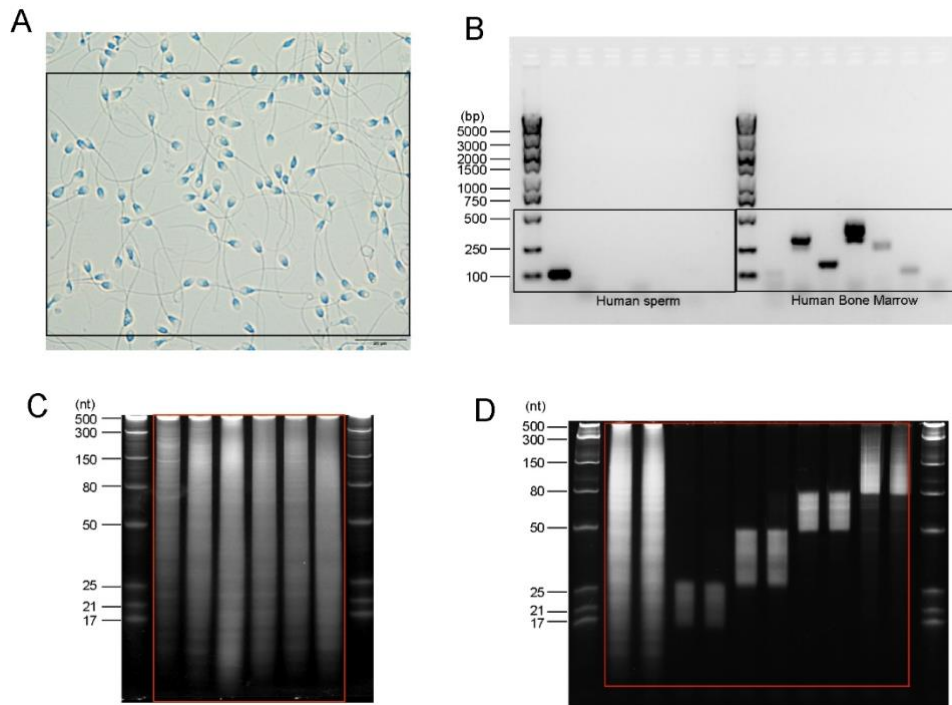

**Supplementary Figure S9:** Original figures of microscope picture and full uncropped gels. **(A)** Full microscopic picture of Figure 1A; **(B)** Full uncropped agarose gel of Figure 1B; **(C)** Full uncropped gel of Figure 1C. **(D)** Full uncropped gel of Figure 2A.

## Supplementary Tables

**Supplementary Table SI.** Primer sequences for RT-PCR.

| <b>Target gene</b> | <b>Oligonucleotide sequences (5'- 3')</b> |                               |
|--------------------|-------------------------------------------|-------------------------------|
| <i>PRM2</i>        | F: GGATCCACAGGCGGCAGCATCGCT;              | R: GCATGTTCTCTTCCTGGTTCTGCA   |
| <i>CDH1</i>        | F: CACCTTCCATGACAGACCC;                   | R: AACGCATTGCCACATACAC        |
| <i>CDH2</i>        | F: CTGAAGTGACTCGTAACGACG;                 | R: CATGTCAGCCAGCTTCTTGAAG     |
| <i>CD4</i>         | F1: TTCAACTGTAAAGGCGAGTG;                 | R1: CGGATTGACTGCCAACTCT       |
|                    | F2: GTGAACCTGGTGGTGATGAGAGC;              | R2: GGCTACATGTCTTCTGAAACCGGTG |
| <i>C-KIT</i>       | F: TACAACGATGTGGGCAAGA;                   | R: TACGAAACCAATCAGCAAAG       |

**Supplementary Table SII.** The concentration of RNA modification standards.

| Abbreviation           | Original (ng/ml) | Diluted times |     |     |     |      |       |       | Abbreviation                      | Original (ng/ml) | Diluted times |     |     |     |       |       |        |
|------------------------|------------------|---------------|-----|-----|-----|------|-------|-------|-----------------------------------|------------------|---------------|-----|-----|-----|-------|-------|--------|
|                        |                  | 2X            | 5X  | 25X | 50X | 200X | 1000X | 2000X |                                   |                  | 2X            | 5X  | 25X | 50X | 200X  | 1000X | 2000X  |
| <b>A</b>               | 250              | 125           | 50  | 10  | 5   | 1.25 | 0.25  | 0.125 | <b>C</b>                          | 2500             | 1250          | 500 | 100 | 50  | 12.5  | 2.5   | 1.25   |
| <b>m<sup>1</sup>A</b>  | 50               | 25            | 10  | 2   | 1   | 0.25 | 0.05  | 0.025 | <b>Cm</b>                         | 500              | 250           | 100 | 20  | 10  | 2.5   | 0.5   | 0.25   |
| <b>I</b>               | 2500             | 1250          | 500 | 100 | 50  | 12.5 | 2.5   | 1.25  | <b>ac<sup>4</sup>C</b>            | 100              | 50            | 20  | 4   | 2   | 0.5   | 0.1   | 0.05   |
| <b>Im</b>              | 50               | 25            | 10  | 2   | 1   | 0.25 | 0.05  | 0.025 | <b>m<sup>6</sup>C</b>             | 200              | 100           | 40  | 8   | 4   | 1     | 0.2   | 0.1    |
| <b>m<sup>6</sup>A</b>  | 20               | 10            | 4   | 0.8 | 0.4 | 0.1  | 0.02  | 0.01  | <b>m<sup>7</sup>C</b>             | 25               | 12.5          | 5   | 1   | 0.5 | 0.125 | 0.025 | 0.0125 |
| <b>Am</b>              | 10               | 5             | 2   | 0.4 | 0.2 | 0.05 | 0.01  | 0.005 | <b>hm<sup>7</sup>C</b>            | 100              | 50            | 20  | 4   | 2   | 0.5   | 0.1   | 0.05   |
| <b>m<sup>1</sup>I</b>  | 50               | 25            | 10  | 2   | 1   | 0.25 | 0.05  | 0.025 | <b>G</b>                          | 1000             | 500           | 200 | 40  | 20  | 5     | 1     | 0.5    |
| <b>U</b>               | 2500             | 1250          | 500 | 100 | 50  | 12.5 | 2.5   | 1.25  | <b>m<sup>2</sup><sub>2</sub>G</b> | 5                | 2.5           | 1   | 0.2 | 0.1 | 0.025 | 0.005 | 0.0025 |
| <b>m<sup>2</sup>U</b>  | 200              | 100           | 40  | 8   | 4   | 1    | 0.2   | 0.1   | <b>m<sup>2</sup>G</b>             | 100              | 50            | 20  | 4   | 2   | 0.5   | 0.1   | 0.05   |
| <b>m<sup>3</sup>U</b>  | 100              | 50            | 20  | 4   | 2   | 0.5  | 0.1   | 0.05  | <b>Gm</b>                         | 50               | 25            | 10  | 2   | 1   | 0.25  | 0.05  | 0.025  |
| <b>Um</b>              | 1000             | 500           | 200 | 40  | 20  | 5    | 1     | 0.5   | <b>m<sup>4</sup>G</b>             | 10               | 5             | 2   | 0.4 | 0.2 | 0.05  | 0.01  | 0.005  |
| <b>m<sup>5</sup>Um</b> | 100              | 50            | 20  | 4   | 2   | 0.5  | 0.1   | 0.05  | <b>m<sup>5</sup>G</b>             | 100              | 50            | 20  | 4   | 2   | 0.5   | 0.1   | 0.05   |
| <b>Ψ</b>               | 500              | 250           | 100 | 20  | 10  | 2.5  | 0.5   | 0.25  | <b>m<sup>2</sup><sub>7</sub>G</b> | 5                | 2.5           | 1   | 0.2 | 0.1 | 0.025 | 0.005 | 0.0025 |

**Supplementary Table SIII.** Clinical parameter analysis of human ejaculated semen samples.

| <b>Characteristic</b>                     | <b>Normozoospermia<br/>(SEM.)</b> | <b>Asthenozoospermia<br/>(SEM.)</b> | <b>Teratozoospermia<br/>(SEM.)</b> | <b>Reference range<br/>(WHO 2010)</b> |
|-------------------------------------------|-----------------------------------|-------------------------------------|------------------------------------|---------------------------------------|
| Age (year)                                | 29.6 (0.48)                       | 29.7 (0.82)                         | 33.3 (1.18)                        | —                                     |
| BMI                                       | 24.5 (1.00)                       | 24.2 (0.83)                         | 23.2 (0.95)                        | —                                     |
| Liquefaction time (min)                   | 30.3 (2.06)                       | 33.1 (2.40)                         | 31.3 (2.68)                        | < 60                                  |
| Semen volume (ml)                         | 3.6 (0.22)                        | 4.3 (0.23)                          | 3.8 (0.24)                         | ≥ 1.5                                 |
| Sperm concentration (10 <sup>6</sup> /ml) | 63.3 (7.88)                       | 56.5 (3.90)                         | 59.4 (4.98)                        | ≥ 15.0                                |
| Total sperm number (10 <sup>6</sup> /ml)  | 211.6 (24.25)                     | 248.1 (23.61)                       | 222.5 (20.69)                      | ≥ 39.0                                |
| <b>Sperm motility (%)</b>                 |                                   |                                     |                                    |                                       |
| Immotility (IM) %                         | 22.5 (2.68)                       | 57.4 (2.36)****                     | 32.4 (2.69)####                    | < 60.0                                |
| Progressive motility (PR) %               | 52.9 (2.64)                       | 22.7 (1.32)****                     | 41.3 (1.91)####                    | ≥ 32.0                                |
| Non-progressive (NP) %                    | 24.6 (1.66)                       | 20.0 (1.30)                         | 26.2 (1.68)#                       | —                                     |
| Total motility (PR+NP) %                  | 77.5 (2.68)                       | 42.6 (2.36)****                     | 67.6 (2.69)####                    | ≥ 40.0                                |
| <b>Sperm morphology (%)</b>               |                                   |                                     |                                    |                                       |
| Sperm with normal morphology              | 8.0 (0.68)                        | 6.0 (0.27)####                      | 2.0 (0.15)****                     | ≥ 4.0                                 |
| Sperm abnormality                         | 92.0 (0.68)                       | 94.0 (0.27)####                     | 98.0 (0.15)****                    | —                                     |
| (Sperm Head)                              | 81.2 (1.39)                       | 84.5 (0.98)####                     | 95.7 (0.29)****                    | —                                     |
| (Sperm Neck)                              | 48.7 (2.41)                       | 52.7 (1.44)                         | 50.3 (1.20)                        | —                                     |
| (Sperm Tail)                              | 4.7 (0.47)                        | 4.6 (0.69)                          | 3.9 (1.17)                         | —                                     |
| Cytoplasmic droplet (CD)                  | 10.7 (0.44)                       | 10.9 (0.79)                         | 13.8 (0.98)*                       | —                                     |
| Teratozoospermia index (TZI)              | 1.5 (0.02)                        | 1.5 (0.01)                          | 1.5 (0.02)                         | —                                     |
| Sperm deformity index (SDI)               | 1.4 (0.03)                        | 1.4 (0.01)#                         | 1.5 (0.02)**                       | —                                     |

\* Compared with NZS # Comparison between AZS and TZS \*/# P<0.05; \*\*/## P<0.01; \*\*\*\*/#### P<0.0001  
NormoZooSpermia (NZS, n=13) AsthenZooSpermia (AZS, n=21) TeratoZooSpermia (TZS, n=15)

All the participants do not perform the basic genetic analysis.

**Supplementary Table SIV:** The R<sup>2</sup> values of Pearson correlation analyses in Figure 4A-B.

| <b>The R<sup>2</sup> values of Pearson correlation analyses in Figure 4A</b> |                       |           |           |           |                          |           |           |           |                          |           |          |          |                          |           |          |           |
|------------------------------------------------------------------------------|-----------------------|-----------|-----------|-----------|--------------------------|-----------|-----------|-----------|--------------------------|-----------|----------|----------|--------------------------|-----------|----------|-----------|
| Type                                                                         | RNA fragments > 80 nt |           |           |           | RNA fragments 50 - 80 nt |           |           |           | RNA fragments 25 - 50 nt |           |          |          | RNA fragments 17 - 25 nt |           |          |           |
|                                                                              | Age                   | PR%       | NP%       | IM%       | Age                      | PR%       | NP%       | IM%       | Age                      | PR%       | NP%      | IM%      | Age                      | PR%       | NP%      | IM%       |
| A                                                                            | 0.01998               | 0.03611   | 0.1042    | 0.07314   | 0.00204                  | 0.0004431 | 0.0167    | 0.0006849 | 0.0006243                | 0.1827    | 0.04913  | 0.1884   | 0.03491                  | 0.01112   | 0.0198   | 0.001556  |
| m <sup>1</sup> A                                                             | 0.002555              | 0.5975    | 0.1414    | 0.5814    | 0.002381                 | 0.01042   | 0.03171   | 0.02131   | 0.002899                 | 0.0001034 | 0.02231  | 0.003558 | 0.01045                  | 0.003553  | 0.07381  | 0.001884  |
| I                                                                            | 0.01068               | 0.002186  | 0.0802    | 0.01873   | 0.0006441                | 0.0007707 | 0.0136    | 0.0002631 | 3.298E-06                | 0.1995    | 0.1115   | 0.2385   | 0.03222                  | 0.008446  | 0.01546  | 0.001138  |
| Am                                                                           | 0.007632              | 0.000227  | 0.0004904 | 0.0003894 | 0.01383                  | 0.03522   | 0.0009677 | 0.02797   | 0.007101                 | 9.399E-05 | 0.03877  | 0.003497 | 2.176E-05                | 0.04089   | 0.008915 | 0.04062   |
| m <sup>1</sup> I                                                             | 0.007683              | 0.1053    | 0.02385   | 0.1059    | 0.003753                 | 0.02705   | 3.611E-06 | 0.01902   | 0.01116                  | 0.08587   | 0.129    | 0.1358   | 0.05784                  | 0.008445  | 0.05614  | 2.804E-05 |
| m <sup>6</sup> A                                                             | 0.0728                | 0.002841  | 0.0006032 | 0.00126   | 0.06262                  | 0.01138   | 0.03842   | 0.02445   | 0.08777                  | 0.00339   | 0.08002  | 0.002294 | 0.01207                  | 0.01523   | 0.05962  | 0.03514   |
| U                                                                            | 0.02236               | 0.0001739 | 0.1123    | 0.01588   | 0.03008                  | 0.02164   | 0.0007119 | 0.01316   | 0.03324                  | 0.005078  | 0.005938 | 0.001123 | 0.0318                   | 0.01338   | 0.1317   | 0.04943   |
| Um                                                                           | 9.482E-05             | 0.0003626 | 0.02687   | 0.001596  | 5.536E-06                | 0.07872   | 0.00874   | 0.0412    | 0.002045                 | 0.0171    | 0.1428   | 0.05701  | 0.0119                   | 0.04489   | 0.006595 | 0.04238   |
| ψ                                                                            | 0.02644               | 0.0004204 | 0.08433   | 0.01367   | 0.03997                  | 0.01087   | 7.784E-05 | 0.007235  | 0.04944                  | 0.01625   | 0.00143  | 0.01438  | 0.02592                  | 0.0284    | 0.1555   | 0.07706   |
| C                                                                            | 0.004093              | 0.00139   | 0.00742   | 0.003702  | 0.008214                 | 0.0112    | 0.02046   | 0.01889   | 0.002193                 | 0.001143  | 0.1159   | 0.02093  | 0.05522                  | 0.04926   | 0.0154   | 0.02043   |
| m <sup>5</sup> C                                                             | 0.04766               | 0.5738    | 0.07853   | 0.607     | 0.02668                  | 0.0342    | 0.04521   | 0.05169   | 0.0004464                | 0.0346    | 0.06136  | 0.0578   | 0.01042                  | 0.01367   | 0.07758  | 5.16E-06  |
| Cm                                                                           | 0.000798              | 0.06091   | 0.001929  | 0.0493    | 0.006386                 | 0.009705  | 0.007049  | 0.01231   | 0.008744                 | 0.01684   | 0.07721  | 0.000186 | 0.06642                  | 0.05398   | 0.002005 | 0.03196   |
| m <sup>3</sup> C                                                             | 0.03153               | 0.6252    | 0.3194    | 0.6909    | 0.002453                 | 6.085E-05 | 0.005683  | 0.0003495 | 0.006781                 | 6.479E-05 | 0.06152  | 0.006106 | 0.0439                   | 0.05876   | 0.008026 | 0.02959   |
| G                                                                            | 0.02884               | 0.3588    | 0.1973    | 0.4352    | 0.0284                   | 0.004872  | 8.406E-05 | 0.003897  | 0.002762                 | 0.01946   | 0.01306  | 0.02421  | 0.02331                  | 0.0173    | 0.05215  | 0.001004  |
| Gm                                                                           | 0.02974               | 0.02606   | 0.08943   | 0.05645   | 0.03003                  | 0.0445    | 0.01377   | 0.04737   | 0.02787                  | 0.04667   | 0.009731 | 0.04634  | 0.04866                  | 0.0417    | 0.03751  | 0.01077   |
| m <sup>7</sup> G                                                             | 0.05085               | 0.4212    | 0.5134    | 0.6377    | 0.01734                  | 0.09164   | 0.05092   | 0.1103    | 0.054                    | 0.004463  | 0.02127  | 0.01145  | 0.01604                  | 0.1262    | 0.1552   | 0.1881    |
| m <sup>2</sup> G                                                             | 0.0673                | 0.5875    | 0.04657   | 0.6689    | 0.0512                   | 0.007338  | 0.00788   | 0.01032   | 0.0002093                | 0.1734    | 0.07258  | 0.1947   | 0.0002394                | 0.0002885 | 0.05933  | 0.00952   |
| m <sup>2</sup> <sub>2</sub> G                                                | 0.07101               | 0.4905    | 0.03477   | 0.4666    | 0.01127                  | 0.008358  | 0.01715   | 0.01462   | 0.006444                 | 0.04542   | 0.02443  | 0.05384  | 0.008723                 | 0.006131  | 0.1374   | 0.03726   |
| m <sup>1</sup> G                                                             | 0.01218               | 0.5896    | 0.1785    | 0.6853    | 0.02972                  | 0.000983  | 0.001047  | 0.0002529 | 0.001117                 | 0.02769   | 0.02437  | 0.03712  | 0.00183                  | 0.0007539 | 0.02807  | 0.001175  |
| m <sup>2</sup> <sub>2</sub> G                                                | 0.03308               | 0.3253    | 0.1661    | 0.3891    | 1.279E-05                | 0.01447   | 0.03739   | 0.02784   | 0.005703                 | 0.1023    | 0.002625 | 0.06276  | 0.01174                  | 0.0631    | 0.05214  | 0.08381   |

| <b>The R<sup>2</sup> values of Pearson correlation analyses in Figure 4B</b> |         |                  |         |        |                  |        |        |        |        |                  |        |                  |        |        |                  |                  |                               |                  |                               |
|------------------------------------------------------------------------------|---------|------------------|---------|--------|------------------|--------|--------|--------|--------|------------------|--------|------------------|--------|--------|------------------|------------------|-------------------------------|------------------|-------------------------------|
| Type                                                                         | A       | m <sup>1</sup> A | I       | Am     | m <sup>6</sup> A | U      | Um     | ψ      | C      | m <sup>5</sup> C | Cm     | m <sup>3</sup> C | G      | Gm     | m <sup>7</sup> G | m <sup>2</sup> G | m <sup>2</sup> <sub>2</sub> G | m <sup>1</sup> G | m <sup>2</sup> <sub>2</sub> G |
| Age                                                                          | 0.02161 | 0.1275           | 0.1098  | 0.393  | 0.08512          | 0.2864 | 0.4113 | 0.2382 | 0.2864 | 0.08523          | 0.4086 | 0.08623          | 0.3633 | 0.3771 | 0.03773          | 0.01648          | 0.03359                       | 0.08379          | 0.01716                       |
| PR%                                                                          | 0.0274  | 0.2039           | 0.2892  | 0.6179 | 0.6712           | 0.7035 | 0.3447 | 0.7203 | 0.2612 | 0.02365          | 0.5483 | 0.08162          | 0.4638 | 0.4177 | 0.1942           | 0.0001           | 0.01458                       | 0.01907          | 0.4057                        |
| NP%                                                                          | 0.3135  | 0.1089           | 0.00949 | 0.2362 | 0.4908           | 0.3753 | 0.1112 | 0.4055 | 0.3146 | 0.1465           | 0.262  | 0.02428          | 0.5345 | 0.2457 | 0.5792           | 0.01375          | 0.2718                        | 0.04702          | 0.03585                       |
| IM%                                                                          | 0.1078  | 0.2337           | 0.1667  | 0.6615 | 0.8352           | 0.81   | 0.3568 | 0.8399 | 0.3747 | 0.06611          | 0.6151 | 0.03299          | 0.6566 | 0.4923 | 0.3885           | 0.00227          | 0.07715                       | 0.03493          | 0.346                         |
